# Supplementary material for: “One-for-All” strategy to design oxygen-deficient triple-shelled MnO2and hollow Fe2O3microcubes for high energy density asymmetric supercapacitors
Source: Royal Society of Chemistry journal article supplement (doi:10.1039/c9dt01682a), 2019-01-01
Supplement: c9dt01682a1.pdf [file c9dt01682a1.pdf]

## Supplementary Information

### **“One-for-All” Strategy to Design Oxygen-Deficient Triple-Shelled MnO<sub>2</sub> and Hollow Fe<sub>2</sub>O<sub>3</sub> Microcubes for High Energy Density Asymmetric Supercapacitors**

Henan Jia<sup>†1</sup>, Haoyan Liang<sup>†1</sup>, Zhaoyue Wang<sup>1</sup>, Chun Li<sup>1</sup>, Xiaohang Zheng<sup>2</sup>, Yifei Cai<sup>1</sup>, Junlei Qi<sup>\*1</sup>, Jian Cao<sup>1</sup>, Jicai Feng<sup>1</sup>, Weidong Fei<sup>2</sup>

*1 State Key Laboratory of Advanced Welding and Joining, Harbin Institute of Technology, Harbin 150001, China*

*2 College of Materials Science and Chemical Engineering, Harbin Institute of Technology, Harbin 150001, China*

\*Corresponding authors: Tel. /fax: 86-451-86418146;

<sup>†</sup>These authors contributed equally.

E-mail: jlqi@hit.edu.cn (J L Qi)

**Calculations.** The specific capacitance was calculated from GCD curves the following equation by integrating discharge current  $I$  [1]

$$C = \frac{I \times \Delta t}{m \times \Delta v}$$

where  $m$  is the weight of active materials (g),  $I$  is the discharge current (A),  $\Delta t$  is the discharge time (S). The power density ( $P$ , KW Kg<sup>-1</sup>) and energy density ( $E$ , W h Kg<sup>-1</sup>) were calculated from GCD curves [2],

$$E = \frac{0.5CV^2}{3.6}$$

$$P = \frac{3600E}{t}$$

where  $C$  is capacitance ( $F\ g^{-1}$ ),  $V$  is the sweep potential range,  $t$  is the discharge time (s).

### **Experimental Section**

**Synthesis of the  $MnCO_3$  microcubes:** Typically, 0.169 g  $MnSO_4 \cdot H_2O$  was fully dissolved in a premixed solution composed of 70 mL of water and 7 mL of ethanol. Afterwards,  $NH_4HCO_3$  (0.84 g) and  $(NH_4)_2SO_4$  (1.321 g) was dissolved in  $H_2O$  (70 mL) to form another uniform solution. The solution of  $NH_4HCO_3$  and  $(NH_4)_2SO_4$  was added into the solution of  $MnSO_4$  under stirring, and the obtained mixture was maintained at room temperature for 3 h. Finally, the obtained  $MnCO_3$  microcubes was washed and dried at 60 °C.

**Synthesis of triple-shelled  $MnO_2$  microcubes:** Triple-shelled  $MnO_2$  microcubes were synthesized from three controlled steps. Step I, the as-obtained  $MnCO_3$  sample (0.017 mol) was redispersed in 40 mL of DW under ultrasonication for 10 min. 19.5 mL of  $KMnO_4$  aqueous solution (0.032 M) was poured into the  $MnCO_3$  dispersion and stirred for another 30 min. Next, the black precipitate was filtered and washed with DW. Then, the sample was redispersed in 0.15 M HCl solution with ultrasonication and stirred for 15 min. Step II, the obtained samples were reacted with  $KMnO_4$  (0.016 M) for 25 min and HCl (0.075 M) for 15 min. Step III, the samples were reacted with  $KMnO_4$  (0.008 M) for 25 min and HCl (0.15 M) for 1 h. The obtained samples were washed with water, ethanol and then dried at 60 °C for 8 h. Hollow  $MnO_2$  microcubes were synthesized according to step I and prolong the HCl treatment to 1h. Double shell  $MnO_2$  microcubes were synthesized according to step I and step II and prolong the HCl treatment in step II to 1h.

**Synthesis of ov- $MnO_2$  microcubes:** The ov- $MnO_2$  microcubes were further synthesized through room temperature reduction in  $NaBH_4$  solution with ethanol as

solvent. In detail, the ov-MnO<sub>2</sub> microcubes were immersed in 1 M NaBH<sub>4</sub> solutions for 30 min at room temperature. After reduction process, the obtained samples were cleaned and dried in the vacuum oven at 60 °C for 2 h.

**Synthesis of hollow Fe<sub>2</sub>O<sub>3</sub> microcubes:** The 0.6 g MnCO<sub>3</sub> sample was redispersed in 100 mL of DW under ultrasonication for 10 min. 100 mL of Fe<sub>2</sub>SO<sub>4</sub> aqueous solution containing 1.08 g Fe<sub>2</sub>SO<sub>4</sub>·7H<sub>2</sub>O was poured into the MnCO<sub>3</sub> dispersion and stirred for 5 min. Then, the solution was transferred to the Teflon-lined stainless steel autoclave and kept at 90 °C for 3h. The obtained sample was rinsed in distilled water, dried in the vacuum oven, and further annealed at 350 °C for 1 h in air to obtain hollow Fe<sub>2</sub>O<sub>3</sub> microcubes.

**Synthesis of ov-Fe<sub>2</sub>O<sub>3</sub> microcubes:** Similar to the synthesis of ov-MnO<sub>2</sub> microcubes, only change the triple-shelled MnO<sub>2</sub> microcubes to hollow Fe<sub>2</sub>O<sub>3</sub> microcubes.

**Materials characterization:** The morphology and structure of the samples were characterized by SEM (Helios Nanolab 600i) and TEM (Tecnai G2 F30), respectively. XRD was performed using a D/max 2550 with graphite monochromatized Cu K $\alpha$  radiation. Raman spectra were collected on a Renishaw inVia Raman Microscope with laser excitation at 532 nm. Surface chemical states were investigated by XPS (Thermo Fisher) with a base pressure of 2×10<sup>-9</sup> mbar.

**Electrochemical Performance Measurements:** Electrochemical measurements were conducted in a typical three-electrode cell. The samples were used as working electrodes. Pt foil as the counter electrode and a saturated calomel electrode (SCE) electrode as reference electrode in 1 M Na<sub>2</sub>SO<sub>4</sub> electrolyte. The working electrodes were prepared by mixing 70 wt% of active material, 20 wt% of carbon black, and 10 wt% of polyvinylidene fluoride (PVDF) in an N-methyl-2-pyrrolidone (NMP) solution to make a slurry. Then, it was coated onto the Ni foam substrate and dried in a vacuum

oven at 60 °C for 12 h. CV curves and the galvanostatic cycling test were carried out on a CHI 760D electrochemical workstation. EIS measurements were performed on PARSTAT 4000A electrochemical workstation, over a frequency range from  $10^5$  to  $10^{-1}$  Hz, at an amplitude of 5 mV. Further, an asymmetric supercapacitor using ov-MnO<sub>2</sub> electrodes as positive electrode and ov-Fe<sub>2</sub>O<sub>3</sub> electrodes as negative electrode were tested in a two-electrode configuration. The mass ratio of two electrodes were balanced by the following relationship:

$$m_+/m_- = (C_- \times \Delta E_-)/(C_+ \times \Delta E_+)$$

where  $m$  (g) is the mass of the electrode materials (anode or cathode),  $C$  (F/g) is the specific capacitance, and  $\Delta E$  is the potential window.

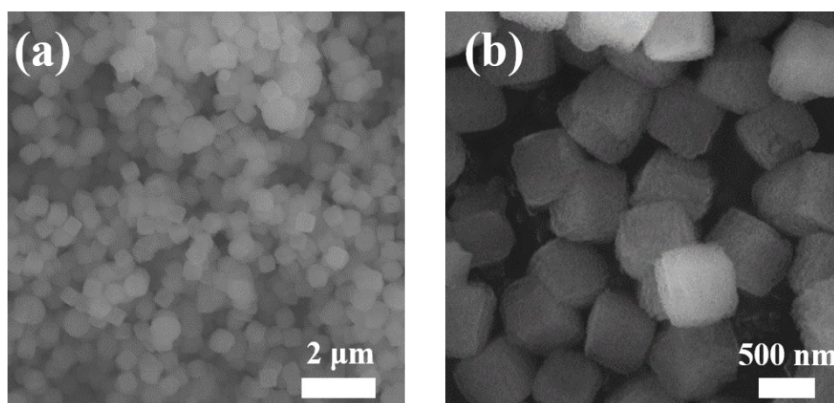

**Figure S1.** SEM images of the MnCO<sub>3</sub> microcubes.

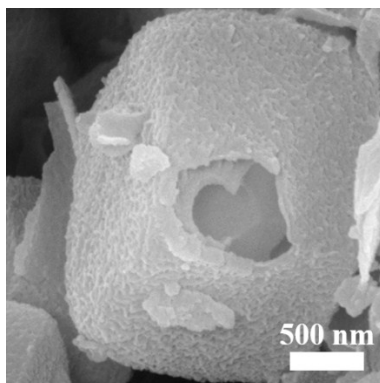

**Figure S2.** SEM images of the broken tips of triple-shelled MnO<sub>2</sub> microcubes revealing its multi-shell structure

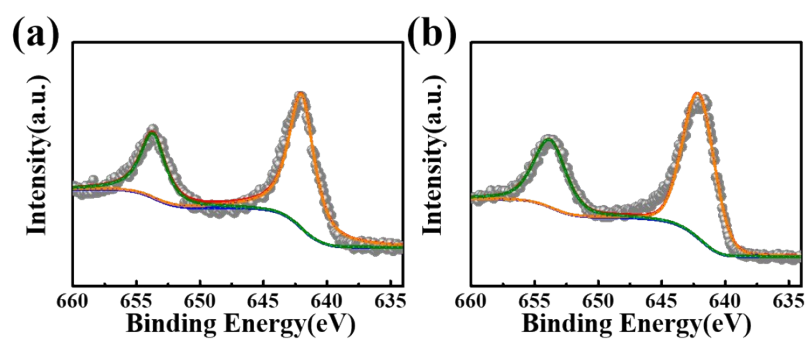

**Figure S3** High-resolution XPS spectrum of Mn 2p in a) triple-shelled MnO<sub>2</sub> microcubes and b) ov-MnO<sub>2</sub> microcubes.

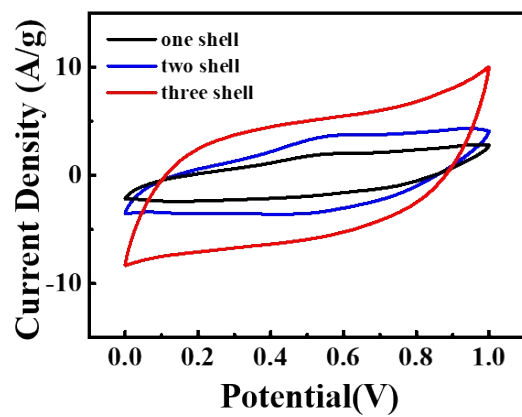

**Figure S4.** CV curves of MnO<sub>2</sub> microcubes with different shell numbers of 1, 2 and 3.

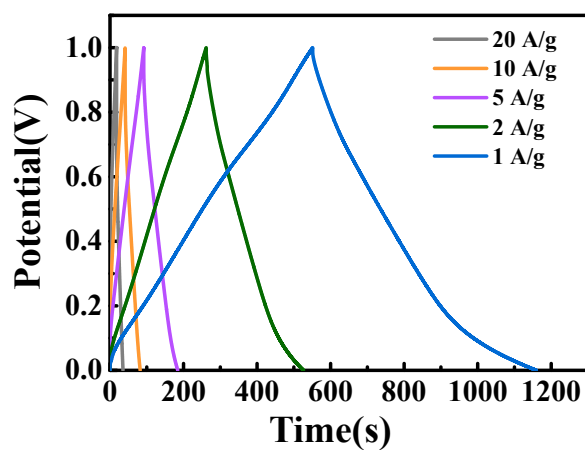

**Figure S5.** GCD curves of ov-MnO<sub>2</sub> microcubes at different current densities.

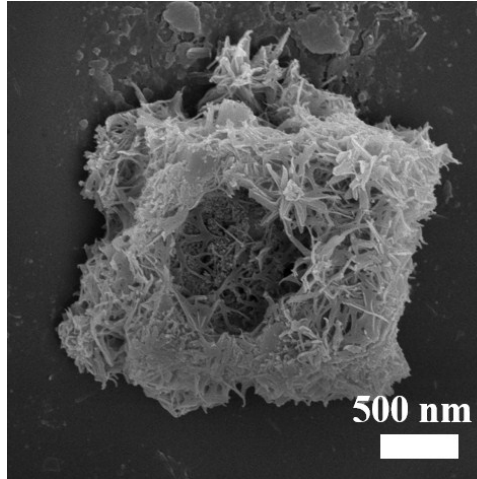

**Figure S6.** SEM image of the cracked hollow Fe<sub>2</sub>O<sub>3</sub> microcube.

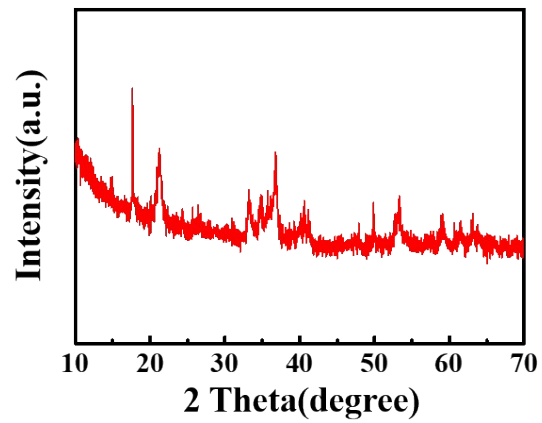

**Figure S7.** XRD pattern of the hollow Fe<sub>2</sub>O<sub>3</sub> microcubes before annealing.

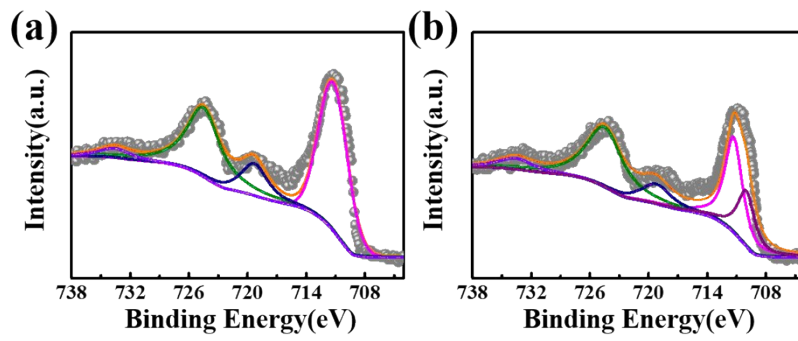

**Figure S8.** High-resolution XPS spectrum of Fe 2p in a) hollow  $\text{Fe}_2\text{O}_3$  microcubes and b) ov- $\text{Fe}_2\text{O}_3$  microcubes.

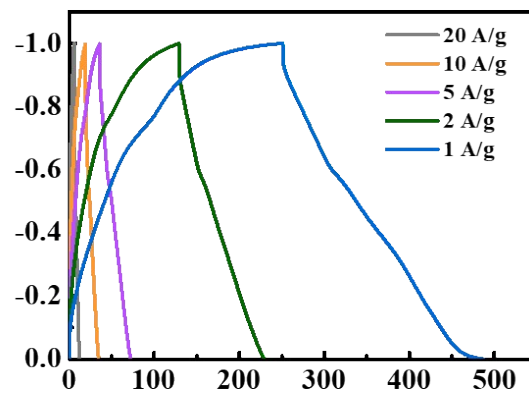

**Figure S9.** the GCD curves of  $\text{Fe}_2\text{O}_3$  hollow microcubes.



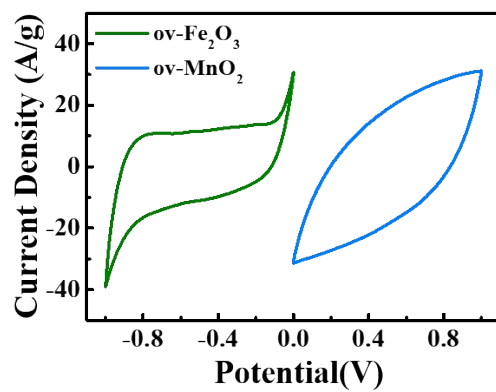

**Figure S10.** CV curves of the ov-MnO<sub>2</sub> and ov-Fe<sub>2</sub>O<sub>3</sub> electrodes at the scan rate of 50 mV s<sup>-1</sup>.

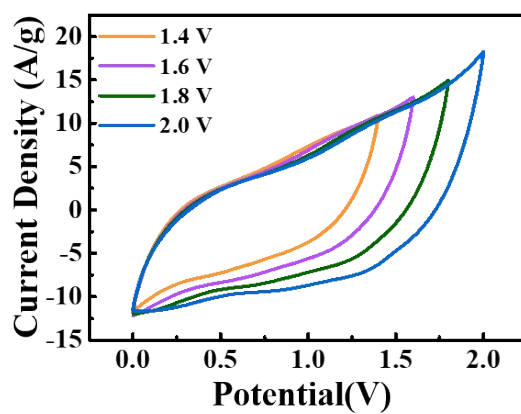

**Figure S11.** CV curves of the ov-MnO<sub>2</sub>//ov-Fe<sub>2</sub>O<sub>3</sub> ASC in different voltage window.
